# Supplementary material for: Effects of the dynamic effective porosity on watertable fluctuations and seawater intrusion in coastal unconfined aquifers
Source: Copernicus journal article supplement (doi:10.5194/hess-2021-634), 2022-01-18
Supplement: Supplementary file 1 [file hess-2021-634-supplement.pdf]

1 Supporting Information for

2 Effects of the dynamic effective porosity on watertable fluctuations and  
3 seawater intrusion in coastal unconfined aquifers

4 Zhaoyang Luo<sup>1,2,#</sup>, Jun Kong<sup>1,3,#</sup>, Lili Yao<sup>4</sup>, Chunhui Lu<sup>1</sup>, Ling Li<sup>5,6</sup>, David Andrew Barry<sup>2</sup>

5 <sup>1</sup>State Key Laboratory of Hydrology-Water Resources and Hydraulic Engineering, Hohai  
6 University, Nanjing, China

7 <sup>2</sup>Ecological Engineering Laboratory (ECOL), Environmental Engineering Institute (IIE), Faculty  
8 of Architecture, Civil and Environmental Engineering (ENAC), École Polytechnique Fédérale  
9 de Lausanne (EPFL), Lausanne, Switzerland

10 <sup>3</sup>Key Laboratory of Coastal Disaster and Protection (Ministry of Education), Hohai University,  
11 Nanjing, China

12 <sup>4</sup>Department of Civil, Environmental, and Construction Engineering, University of Central  
13 Florida, Orlando, USA

14 <sup>5</sup>School of Engineering, Westlake University, Hangzhou, China

15 <sup>6</sup>School of Civil Engineering, The University of Queensland, Brisbane, Australia

16  
17 <sup>#</sup>Corresponding authors: Zhaoyang Luo ([zhaoyang.luo@epfl.ch](mailto:zhaoyang.luo@epfl.ch)) and Jun Kong  
18 ([kongjun999@126.com](mailto:kongjun999@126.com))

19  
20 **Contents of this file**

21 Figures S1-S5

22 **Introduction**

23 Figure S1 shows a schematic diagram of an unconfined aquifer.

24 Figure S2 shows the experimental apparatus used to quantify the dynamic effective porosity.

25 Figure S3 plots amplitude decay rate ( $k_r D$ ) and phase lag increase rate ( $k_i D$ ) versus non-  
26 dimensional aquifer depth ( $n_e \omega D / K_s$ ) for watertable waves obtained from experiments and  
27 different existing theories.

28 Figure S4 plots amplitude decay rate ( $k_r D$ ) and phase lag increase rate ( $k_i D$ ) versus non-  
29 dimensional aquifer depth ( $n_e \omega D / K_s$ ) for watertable waves obtained from experiments and  
30 existing theory that combines equation (2) with the complex-valued expression for the  
31 dynamic effective porosity proposed by Cartwright et al. (2005).

32 Figure S5 gives the numerical model setup for the base case.

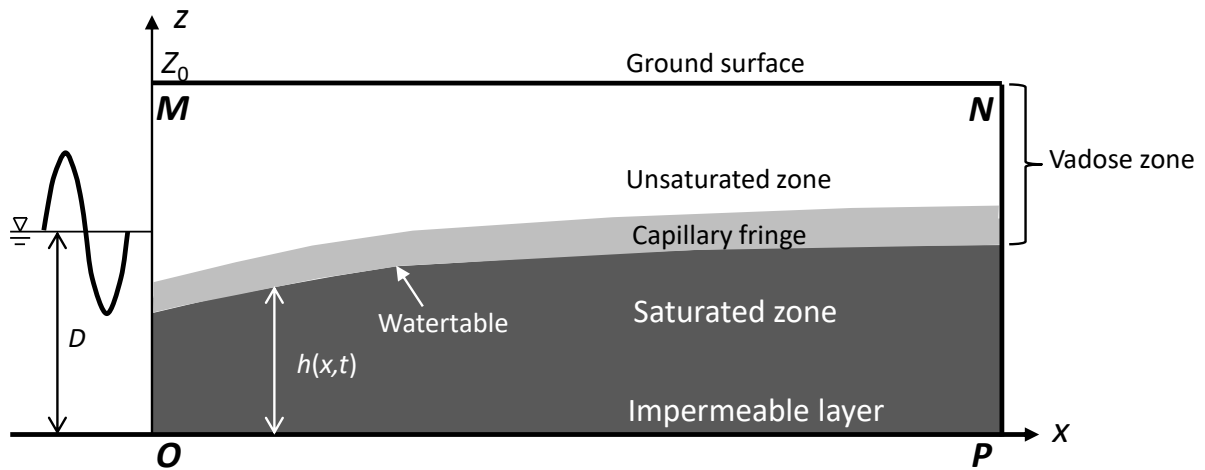

33

34 **Figure S1.** Schematic diagram of an unconfined aquifer (modified from Kong et al. (2015)).  
 35 *OPNM* represents the aquifer normal to the shoreline with a vertical sea boundary (*OM*). *OP*  
 36 and *PN* are impermeable while *MN* is the ground surface,  $t$  [T] is time,  $x$  [L] is the horizontal  
 37 distance from the vertical seaward boundary,  $D$  [L] is the aquifer depth (equal to the mean  
 38 height of the boundary forcing), and  $h$  [L] is the watertable height above the impermeable  
 39 layer.

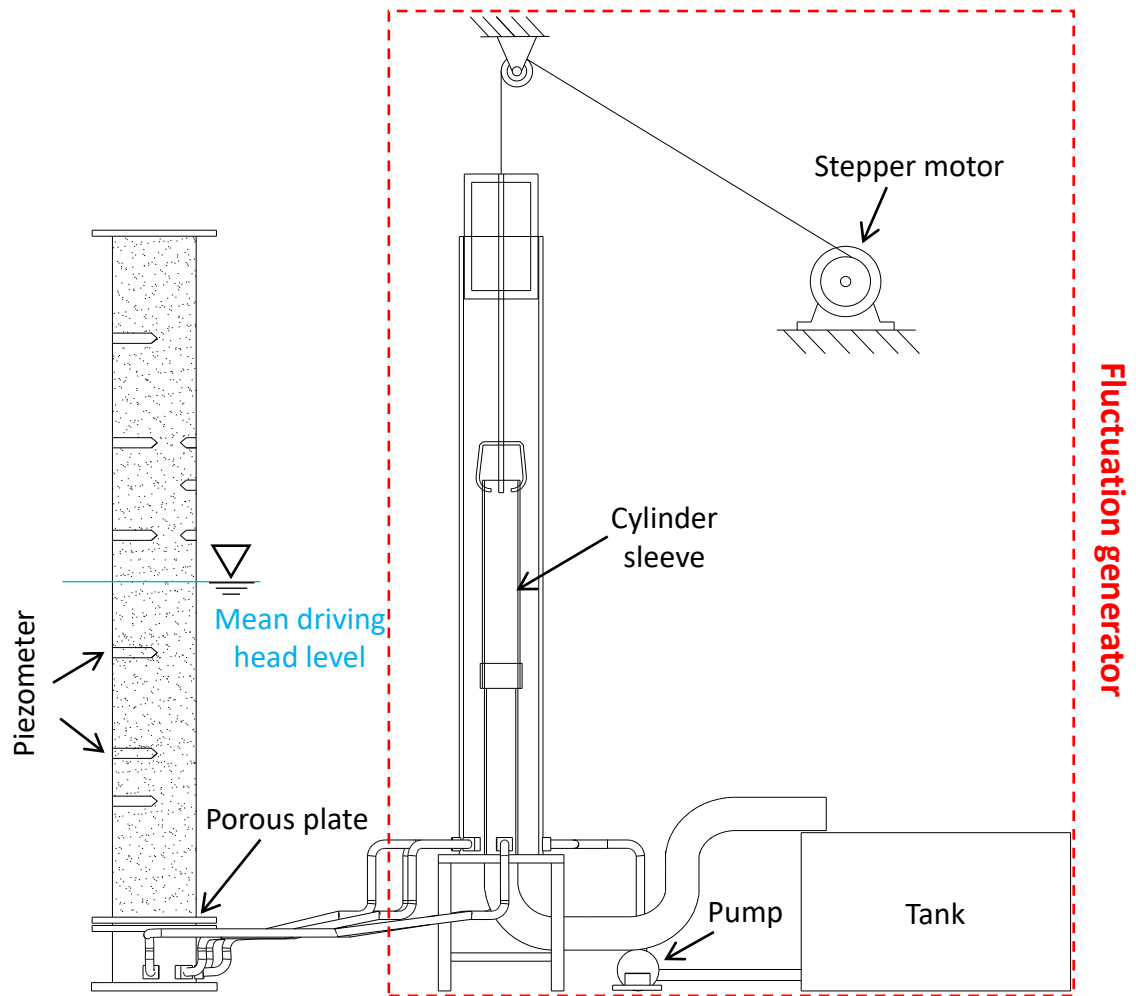

40

41 **Figure S2.** Experimental apparatus used to quantify the dynamic effective porosity, modified

42 from Luo et al. (2020).

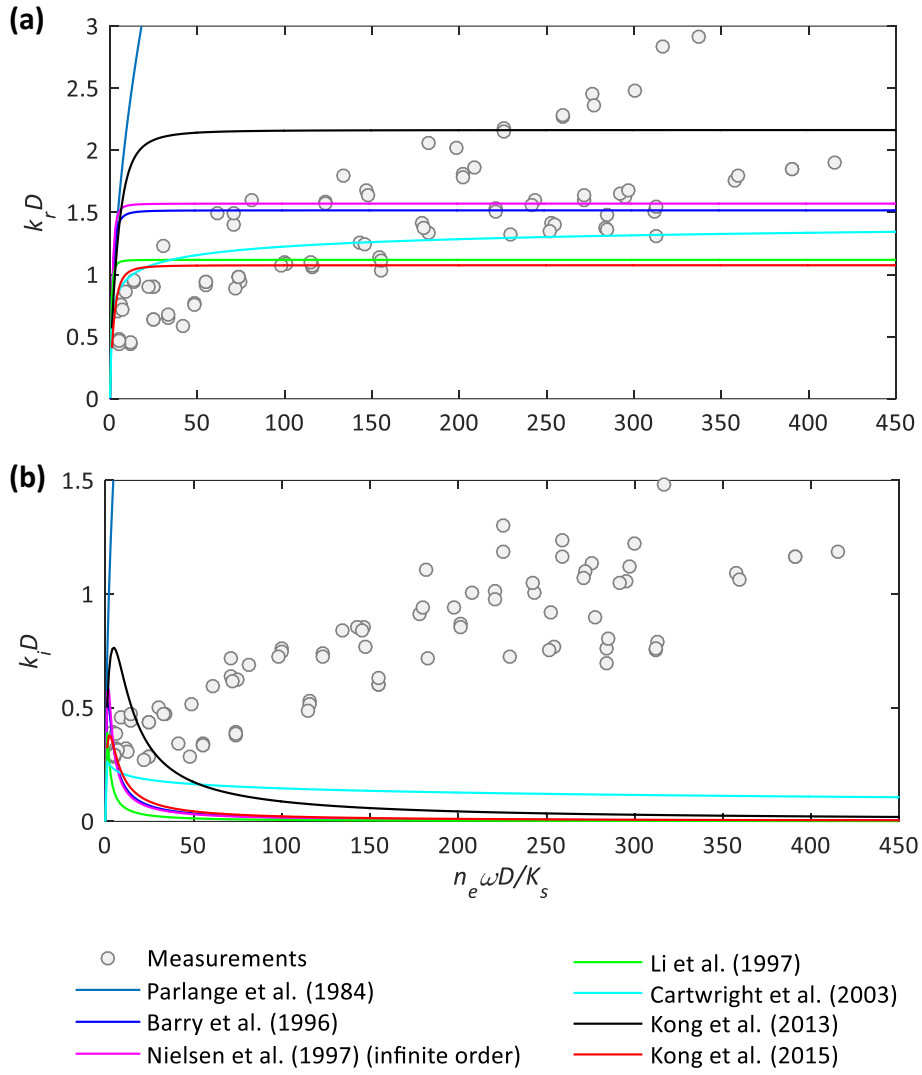

**Figure S3.** Comparison of (a) amplitude decay rate ( $k_r D$ ) versus non-dimensional aquifer depth ( $n_e \omega D / K_s$ ) and (b) phase lag increase rate ( $k_i D$ ) versus non-dimensional aquifer depth ( $n_e \omega D / K_s$ ) for watertable waves obtained from experiments and different existing theories. Parameters used are consistent with Shoushtari et al. (2016):  $D = 0.92$  m,  $H_\psi = 0.61$  m and  $K_s = 4.7 \times 10^{-4}$  m/s. Parameter definitions are given in the main text.

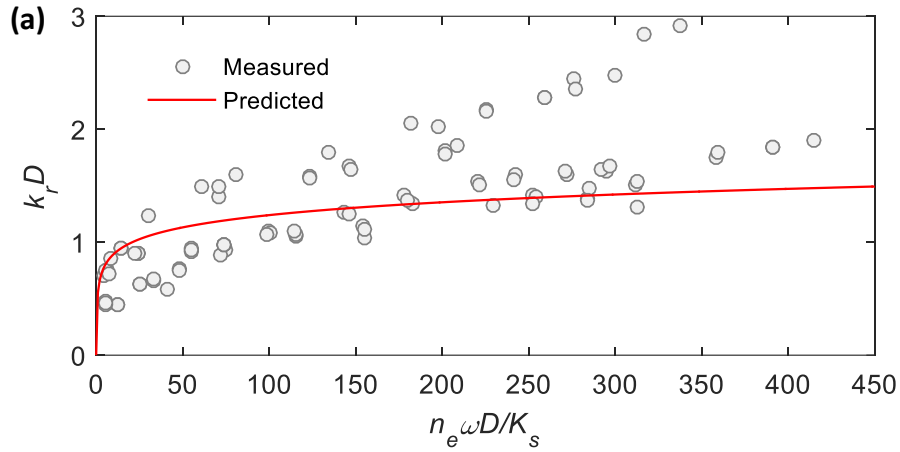

50

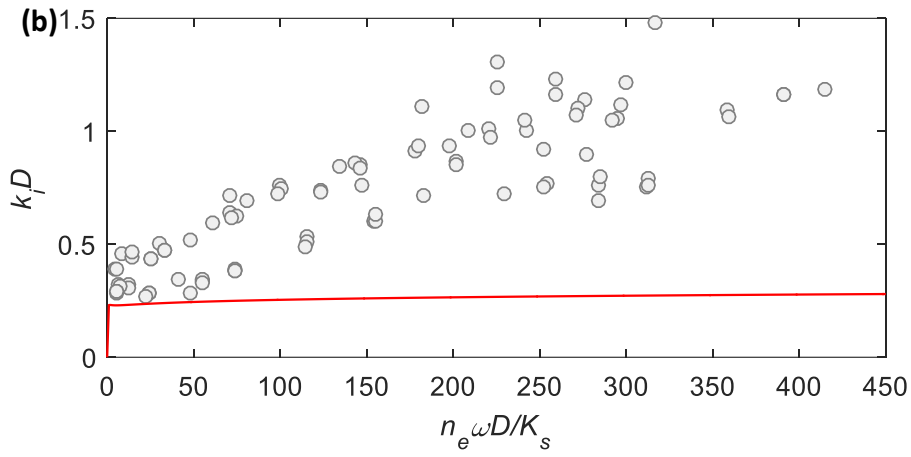

51

52 **Figure S4.** Comparison of (a) amplitude decay rate ( $k_r D$ ) versus non-dimensional aquifer  
 53 depth ( $n_e \omega D / K_s$ ) and (b) phase lag increase rate ( $k_i D$ ) versus non-dimensional aquifer depth  
 54 ( $n_e \omega D / K_s$ ) for watertable waves obtained from experiments and existing theory that  
 55 combines equation (2) with the complex-valued expression for the dynamic effective  
 56 porosity proposed by Cartwright et al. (2005). Parameters used are consistent with  
 57 Shoushtari et al. (2016):  $D = 0.92$  m,  $H_\psi = 0.61$  m and  $K_s = 4.7 \times 10^{-4}$  m/s.

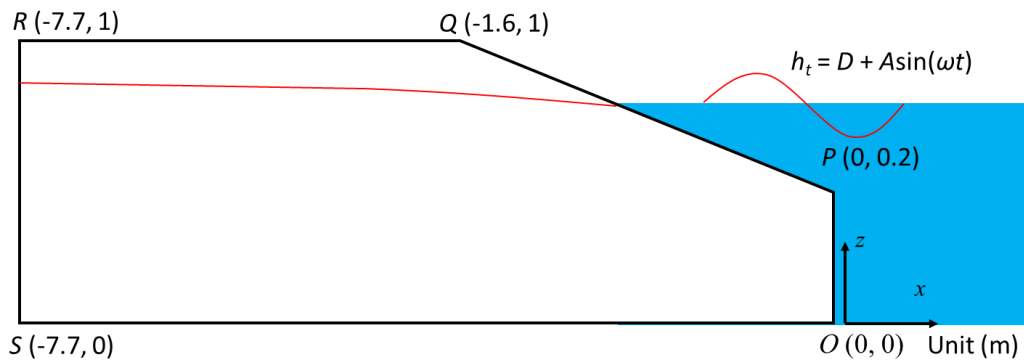

**Model setup**

**Boundary conditions:**

*RS*: Constant head boundary with  $h = 0.74$  m and  $c = 0$  ppt

*OPQ*: Time-dependent head boundary with  $D = 0.7$  m,  $A = 0.075$  m and  $T = 240$  s ( $\omega = 2\pi/T$ ), and  $c = 35$  ppt

*OS*: No flow boundary

*QR*: Atmospheric boundary

**Initial conditions:**

$h = 0.70$  m,  $c = 0$  ppt

**Soil properties:**

VG parameters:  $\alpha = 11 \text{ m}^{-1}$ ,  $n = 6$ ,

Hydraulic conductivity:  $K_s = 3 \times 10^{-3} \text{ m/s}$

Static effective porosity: 0.4

Diffusion coefficient:  $1 \times 10^{-9} \text{ m}^2/\text{s}$

Longitudinal dispersivity: 0.006 m

Transversal dispersivity: 0.0006 m

**Mesh sizes and time step:**

$\Delta x = 0.02$  m,  $\Delta z = 0.1$  m and  $\Delta t = 4$  s

58

59 **Figure S5.** Numerical model setup for the base case (Shen et al., 2020), which uses a van  
60 Genuchten (VG) soil.

## References

- Barry, D. A., Barry, S. J., & Parlange, J.-Y. 1996. Capillarity correction to periodic solutions of the shallow flow approximation, In *Mixing Processes in Estuaries and Coastal Seas*, C. B. Pattiaratchi (editor), *Coastal and Estuarine Studies*, Volume 50, American Geophysical Union, Washington, DC, pp. 496–510. <https://doi.org/10.1029/CE050>
- Cartwright, N., Nielsen, P., & Dunn, S. (2003). Water table waves in an unconfined aquifer: Experiments and modeling. *Water Resources Research*, 39(12), 1330. <https://doi.org/10.1029/2003WR002185>
- Li, L., Barry, D. A., Parlange, J.-Y., & Pattiaratchi, C. B. (1997). Beach water table fluctuations due to wave run-up: Capillarity effects. *Water Resources Research*, 33(5), 935-945. <https://doi.org/10.1029/96WR03946>
- Luo, Z., Kong, J., Ji, Z., Shen, C., Lu, C., Xin, P., Zhao, Z., Li, L., & Barry, D. A. (2020). Watertable fluctuation-induced variability in the water retention curve: Sand column experiments. *Journal of Hydrology*, 589, 125125. <https://doi.org/10.1016/j.jhydrol.2020.125125>
- Nielsen, P., Aseervatham, R., Fenton, J. D., & Perrochet, P. (1997). Groundwater waves in aquifers of intermediate depths. *Advances in Water Resources*, 20(1), 37–43. [https://doi.org/10.1016/S0309-1708\(96\)00015-2](https://doi.org/10.1016/S0309-1708(96)00015-2)
- Kong, J., Shen, C.-J., Xin, P., Song, Z., Li, L., Barry, D. A., Jeng, D.-S., Stagnitti, F., Lockington, D. A., & Parlange, J.-Y. (2013). Capillary effect on water table fluctuations in unconfined aquifers. *Water Resources Research*, 49(5), 3064–3069. <https://doi.org/10.1002/wrcr.20237>
- Kong, J., Xin, P., Hua, G.-F., Luo, Z.-Y., Shen, C.-J., Chen, D., & Li, L. (2015). Effects of vadose zone on groundwater table fluctuations in unconfined aquifers. *Journal of Hydrology*, 528, 397–407. <https://doi.org/10.1016/j.jhydrol.2015.06.045>
- Parlange, J.-Y., Stagnitti, F., Starr, J. L., & Braddock, R. D. (1984). Free-surface flow in porous media and periodic solution of the shallow-flow approximation. *Journal of Hydrology*, 70(1-4), 251-263. [https://doi.org/10.1016/0022-1694\(84\)90125-2](https://doi.org/10.1016/0022-1694(84)90125-2)
- Shen, Y., Xin, P., & Yu, X. (2020). Combined effect of cutoff wall and tides on groundwater flow and salinity distribution in coastal unconfined aquifers. *Journal of Hydrology*, 581, 124444. <https://doi.org/10.1016/j.jhydrol.2019.124444>
